# Supplementary material
Source: ML conference proceedings conference paper supplement (https://aclanthology.org/2022.acl-long.409)
Supplement: software [file vocab.xls]

## Sheet: Sheet1
一级	二级	三级	四级	五级	六级	七-九级
爱	啊	爱心	阿姨	安慰	挨着	发布会
爱好	爱情	安排	啊	岸	挨	发财
八	爱人	安装	矮	岸上	挨打	发愁
爸爸/爸	安静	按	矮小	按摩	安检	发电机
吧	安全	按照	爱国	拔	罢工	发抖
白	白色	把	爱护	白酒	罢了	发愤图强
白天	班长	把握	安	拜访	白领	发光
百	办	白	安置	版	百分点	发火
班	办法	白菜	按时	扮演	办公	发酵
半	办公室	班级	暗	棒	办事处	发掘
半年	半夜	搬	暗示	包围	办学	发愣
半天	帮助	搬家	巴士	包装	半决赛	发脾气
帮	饱	板	百货	保卫	傍晚	发起人
帮忙	报名	办理	摆	保养	保健	发热
包	报纸	保	摆动	报答	报刊	发誓
包子	北方	保安	摆脱	报警	报考	发泄
杯	背	保持	败	抱怨	抱歉	发扬
杯子	比如	保存	办事	背包	暴风雨	发扬光大
北	比如说	保护	包裹	悲剧	暴力	发育
北边	笔	保留	包含	悲伤	暴露	发源地
北京	笔记	保险	包括	北极	暴雨	发作
本	笔记本	保证	薄	被动	爆	阀门
本子	必须	报	宝	辈	爆发	发型
比	边	报到	宝宝	本人	爆炸	帆
别	变	报道	宝贝	鼻子	悲惨	帆船
别的	变成	报告	宝贵	比方	背心	翻番
别人	遍	背	宝石	比重	背着	翻来覆去
病	表	北部	保密	彼此	被告	翻天覆地
病人	表示	背后	保守	必	奔跑	凡
不大	不错	被	抱	必需	本	烦闷
不对	不但	被子	背景	毕竟	本地	烦恼
不客气	不够	本来	倍	闭幕	本期	烦躁
不用	不过	本领	被迫	闭幕式	本身	繁华
不	不太	本事	本科	边境	本土	繁忙
菜	不要	比较	笨	编辑	本质	繁体字
茶	不好意思	比例	比分	变动	逼	繁重
差	不久	比赛	毕业	便利	笔试	反驳
常	不满	必然	毕业生	便条	必将	反差
常常	不如	必要	避	便于	必修	反常
唱	不少	变化	避免	宾馆	闭	反倒
唱歌	不同	变为	编	饼	边缘	反感
车	不行	标题	辩论	饼干	编制	反过来
车票	不一定	标准	标志	病毒	扁	反击
车上	不一会儿	表达	表情	玻璃	变更	反馈
车站	部分	表格	表扬	博客	变换	反面
吃	才	表面	别	博览会	变形	反思
吃饭	菜单	表明	冰	博士	便	反弹
出	参观	表现	冰箱	博物馆	便是	反省
出来	参加	表演	冰雪	薄弱	遍地	返还
出去	草	并	兵	不顾	表面上	犯愁
穿	草地	并且	并	不利	病房	饭碗
床	层	播出	不要紧	不耐烦	病情	泛滥
次	查	播放	不在乎	不幸	拨打	范畴
从	差不多	不必	不管	不易	波动	贩卖
错	长	不断	不然	补偿	波浪	方方面面
打	常见	不论	布置	补贴	播	方向盘
打车	常用	补	步行	不曾	不便	方言
打电话	场	补充	擦	不得了	不见	防盗
打开	超过	不安	才	不敢当	不料	防盗门
打球	超市	不得不	材料	不良	不再	防护
大	车辆	不光	财产	不免	不至于	防火墙
大学	称	不仅	财富	不能不	补考	防卫
大学生	成	布	采访	不时	补课	防汛
到	成绩	步	参考	不停	补习	防疫
得到	成为	部	参与	不许	补助	防御
地	重复	部门	操场	不止	捕	妨碍
的	重新	部长	操作	不足	不成	妨害
等	出发	才能	测	部位	不禁	房地产
地点	出国	采取	测量	猜	不仅仅	仿
地方	出口	采用	测试	猜测	不通	仿制
地上	出门	彩色	曾	裁判	不怎么	访谈
地图	出生	曾经	茶叶	采购	不怎么样	纺织
弟弟/弟	出现	产生	产品	彩票	不值	放过
第/第二	出院	长城	长途	餐馆	布满	放水
点	出租	长处	常识	餐厅	部队	放肆
电	出租车	长期	唱片	餐饮	采纳	放映
电话	船	厂	抄	草原	踩	放置
电脑	吹	场合	抄写	册	参赛	放纵
电视	春节	场所	潮	层次	参展	飞速
电视机	春天	超级	潮流	叉	餐	飞往
电影	词	朝	潮湿	叉子	残疾	飞翔
电影院	词典	吵	彻底	差别	残疾人	飞跃
东	词语	吵架	沉	差距	残酷	非/非金属
东边	从小	衬衫	沉默	插	惨	非得
东西	答应	衬衣	沉重	查询	仓库	非法
动	打工	称为	称赞	差点儿/差一点儿	藏	非凡
动作	打算	成功	成人	拆	操纵	绯闻
都	打印	成果	诚实	拆除	厕所	肥料
读	大部分	成就	诚信	产业	侧	肥胖
读书	大大	成立	承担	长度	测定	肥沃
对	大多数	成熟	承认	长寿	策划	肥皂
对不起	大海	成员	承受	肠	策略	诽谤
多	大家	成长	程序	尝	层面	废
多少	大量	城	吃惊	尝试	差异	废除
饿	大门	城市	迟到	厂长	查出	废话
儿子	大人	程度	尺	场面	查看	废品
二	大声	持续	尺寸	倡导	拆迁	废寝忘食
饭	大小	充满	尺子	超越	产量	废物
饭店	大衣	重	冲	车主	昌盛	废墟
房间	大自然	初	充电	称	长短	沸沸扬扬
房子	带	初/初一	充电器	称号	长假	沸腾
放	带来	初步	充分	成本	长久	费劲
放假	单位	初级	虫子	成交	长跑	分辨
放学	但	初中	抽	成效	长远	分寸
飞	但是	除了	抽奖	成语	常规	分担
飞机	蛋	处理	抽烟	承办	常年	分割
非常	当	传	出口	城里	厂商	分红
分	当时	传播	出色	乘	场地	分化
风	倒	传来	出售	乘车	场馆	分泌
干	到处	传说	出席	乘客	场景	分明
干净	道	创新	处于	乘坐	畅通	分歧
干什么	道理	创业	处	吃力	超	分赃
高	道路	创造	穿上	池子	超出	分支
高兴	得	创作	传统	迟	炒	芬芳
告诉	得出	从来	窗户	冲动	炒股	吩咐
哥哥/哥	的话	从前	窗台	冲突	炒作	氛围
歌	灯	从事	窗子	充足	车号	坟
个	等	村	春季	愁	车牌	坟墓
给	等到	存	纯	丑	车展	焚烧
跟	等于	存在	纯净水	臭	撤离	粉
工人	低	错误	词汇	出版	撤销	粉丝
工作	地球	达到	此	出差	撑	粉碎
关	地铁	打破	此外	出汗	成	分量
关上	地铁站	打听	次	出于	成分	分外
贵	点头	大概	刺	初期	成品	份额
国	店	大使馆	刺激	除非	承诺	奋力
国家	掉	大约	从此	除夕	城区	奋勇
国外	东北	大夫	粗	厨房	城乡	粪
过	东方	代	粗心	处罚	城镇	粪便
还	东南	代表	促进	处分	持有	丰富多彩
还是	冬天	代表团	促使	处在	冲击	丰厚
还有	懂	带动	促销	传达	重建	丰满
孩子	懂得	带领	措施	传递	重组	丰盛
汉语	动物	单元	打	传真	崇拜	丰硕
汉字	动物园	当初	答案	窗帘	宠物	风波
好	读音	当地	打败	闯	冲	风采
好吃	度	当然	打雷	创立	出场	风餐露宿
好看	短	当中	打扫	辞典	出动	风范
好听	短信	刀	打折	辞职	出访	风风雨雨
好玩儿	段	导演	打针	此后	出路	风和日丽
号	队	到达	大巴	此刻	出面	风浪
喝	队长	到底	大多	此时	出名	风力
和	对	得分	大方	聪明	出入	风流
很	对话	等待	大哥	从而	出事	风貌
后	对面	底下	大规模	从中	出台	风气
后边	多	地区	大会	脆	出行	风情
后天	多久	电视剧	大姐	存款	初等	风趣
花	多么	电视台	大楼	寸	除	风沙
话	多数	电台	大陆	达成	厨师	风尚
坏	多云	电子邮件	大妈	答	储存	风水
回	而且	调	大型	答复	处处	风味
回答	发	调查	大爷	打	处长	风雨
回到	发现	订	大众	打扮	传出	风云
回家	饭馆	定期	代替	打包	传媒	风筝
回来	方便	东部	待遇	打击	传输	封顶
回去	方便面	动力	袋	打架	传言	封建
会	方法	动人	戴	打扰	船员	封面
火车	方面	读者	担保	大胆	船长	封锁
机场	方向	短处	担任	大都	船只	疯子
机票	放下	短裤	担心	大纲	串	峰回路转
鸡蛋	放心	短期	单	大伙儿	窗口	蜂蜜
几	分	断	单纯	大奖赛	创办	逢
记	分开	队员	单调	大脑	创建	缝
记得	分数	对待	单独	大事	创意	缝合
记住	分钟	对方	淡	大厅	此处	讽刺
家	份	对手	导游	大象	此次	凤凰
家里	封	对象	导致	大熊猫	此前	否决
家人	服务	顿	倒闭	大于	此事	孵化
间	复习	发表	倒车	大致	此致	敷
见	该	发出	得意	呆	次数	扶持
见面	改	发达	得	待	从不	服饰
教	改变	发动	灯光	代价	从没	服务器
叫	干杯	发明	登	代理	醋	服用
教学楼	感到	发生	登记	带有	村庄	俘获
姐姐/姐	感动	发送	登录	贷款	错过	俘虏
介绍	感觉	发言	登山	单一	搭	浮力
今年	感谢	发展	的确	胆	搭档	浮现
今天	干活儿	反对	敌人	胆小	搭配	浮躁
进	刚	反复	底	蛋糕	打动	辐射
进来	刚才	反应	地方	当场	打断	福气
进去	刚刚	反正	地面	当代	打发	抚摸
九	高级	范围	地位	当年	打官司	抚恤
就	高中	方式	地下	当前	打牌	抚养
觉得	个子	防	地址	当选	打印机	抚养费
开	更	防止	典型	挡	打造	斧子
开车	公共汽车	房东	点名	到来	大道	俯首
开会	公交车	房屋	电灯	倒是	大街	辅导
开玩笑	公斤	房租	电动车	道德	大力	腐败
看	公里	访问	电梯	得了	大米	腐化
看病	公路	放到	电源	得以	大批	腐烂
看到	公平	飞行	顶	等候	大赛	腐蚀
看见	公司	费	定	等级	大师	腐朽
考	公园	费用	冬季	低于	大使	付费
考试	狗	分别	动画片	地带	待会儿	付款
渴	够	分配	动摇	地形	担忧	负面
课	故事	分组	豆腐	地震	单打	负有
课本	故意	丰富	独立	递	诞生	附
课文	顾客	风险	独特	递给	党	附带
口	关机	否定	独自	典礼	当	附和
块	关心	否认	堵	点燃	当成	附加
快	观点	服装	堵车	电池	当天	附属
来	广场	福	肚子	电饭锅	当作	赴
来到	广告	父母	度过	电子版	档	复查
老	国际	父亲	锻炼	调动	档案	复发
老人	过来	付	对比	丢	岛	复合
老师	过年	负责	对付	动机	到期	复活
了	过去	复印	对于	动手	盗版	复兴
累	过	复杂	多次	动态	道教	复原
冷	海	富	多年	动员	道歉	副作用
里	海边	改进	多样	冻	低头	赋予
里边	喊	改造	多种	洞	低温	富含
两	好	概念	恶心	豆制品	滴	富豪
零/〇	好处	赶	儿童	毒	抵达	富强
六	好多	赶到	而	堆	抵抗	富翁
楼	好久	赶紧	而是	对立	地板	富裕
楼上	好人	赶快	耳机	对应	地名	富足
楼下	好事	敢	二手	吨	地下室	腹部
路	好像	感冒	发挥	朵	电车	腹泻
路口	合适	感情	发票	躲	电动	覆盖
路上	河	感受	发烧	儿女	电力	该
妈妈/妈	黑	干吗	法	耳朵	电器	改版
马路	黑板	高速	法官	二维码	吊	改编
马上	黑色	高速公路	法律	发布	调研	改动
吗	红	告别	法院	发觉	跌	改革开放
买	红色	歌迷	翻	发射	定价	改良
慢	后来	歌声	翻译	发行	定时	改名
忙	忽然	歌手	烦	罚	定位	改日
毛	湖	个人	反	罚款	动画	改为
没	护照	个性	反而	法规	斗争	改邪归正
没关系	花	各	反映	法制	都市	钙
没什么	花园	各地	方	繁荣	毒品	盖子
没事儿	画	各位	方案	返回	赌	概况
没有	画家	各种	方针	防治	赌博	概率
妹妹/妹	画儿	各自	放松	放大	渡	概论
门	坏处	根本	非	放弃	端	干戈
门口	坏人	更加	肥	分成	端午节	干旱
门票	欢迎	工厂	分布	分解	短片	干燥
们/朋友们	换	工程师	分散	分类	队伍	甘心
米饭	黄	工夫	分手	分离	对抗	肝脏
面包	黄色	工具	分为	分析	对外	尴尬
面条儿	回	工业	分之	分享	蹲	赶赴
名字	回国	工资	纷纷	丰收	多半	赶往
明白	会	公布	奋斗	风度	多方面	敢情
明年	活动	公共	风格	风光	多媒体	感/责任感
明天	或	公开	风景	封	夺	感触
拿	或者	公民	风俗	疯	夺取	感恩
哪	机会	公务员	封闭	疯狂	恩人	感激
哪里	鸡	功夫	否则	扶	儿科	感慨
哪儿	级	功课	夫妇	服从	发病	感染
哪些	急	功能	夫妻	幅	发电	感染力
那	计划	共同	夫人	幅度	发放	感叹
那边	计算机	共有	符号	福利	发怒	感性
那里	加	姑娘	符合	辅助	发起	干部
那儿	加油	古	付出	负责人	发言人	干事
那些	家/科学家	古代	负担	附件	发炎	刚毅
奶	家庭	故乡	附近	改革	法庭	纲领
奶奶	家长	挂	复制	干脆	法语	纲要
男	假	关系	改善	干扰	番	钢
男孩儿	假期	关注	改正	干预	番茄	缸
男朋友	检查	观察	盖	感想	凡是	港
男人	见到	观看	概括	钢笔	繁殖	杠铃
男生	见过	观念	感兴趣	钢琴	反抗	高昂
南	件	观众	高潮	高大	反问	高傲
南边	健康	管	高价	高度	反响	高超
难	讲	管理	高尚	高跟鞋	犯	高低
呢	讲话	光	高铁	高温	犯规	高调
能	交	光明	格外	高于	犯罪	高额
你	交给	广播	隔	高原	防范	高尔夫球
你们	交朋友	广大	隔开	搞	防守	高峰期
年	交通	规定	个别	搞好	房价	高贵
您	角	规范	个体	歌曲	仿佛	高空
牛奶	角度	国内	各个	隔壁	飞船	高龄
女	饺子	国庆	根	个儿	飞行员	高明
女儿	脚	果然	根据	跟前	肺	高山
女孩儿	叫作	果汁	工程	跟随	分工	高效
女朋友	教师	过程	公元	更换	分裂	高新技术
女人	教室	过去	供应	更新	愤怒	高血压
女生	教学	哈哈	共	工艺	风暴	高压
旁边	教育	海关	构成	工作日	峰会	高雅
跑	接	害怕	构造	公告	奉献	高涨
朋友	接到	行	购买	公认	佛	搞鬼
票	接受	好好	购物	公式	佛教	搞笑
七	接下来	好奇	骨头	公正	服	告
起	接着	合	固定	共计	浮	告辞
起床	街	合法	瓜	共享	父女	告诫
起来	节	合格	怪	沟	父子	告示
汽车	节目	合理	关	沟通	负	告知
前	节日	合作	关闭	估计	妇女	告状
前边	结果	和平	关于	古老	复苏	戈壁
前天	借	红茶	官	鼓	副	胳膊
钱	斤	红酒	官方	鼓励	富人	鸽子
钱包	今后	后果	光临	鼓掌	富有	搁
请	进入	后面	光盘	顾问	改装	搁浅
请假	进行	后年	逛	怪	干涉	搁置
请进	近	互联网	归	关怀	肝	割
请问	经常	互相	规律	关键	杆	歌剧
请坐	经过	划船	规模	冠军	赶不上	歌颂
球	经理	华人	规则	光荣	赶忙	歌舞
去	酒	化/现代化	果实	光线	赶上	歌咏
去年	酒店	话剧	过分	广	敢于	革命
热	就要	话题	海水	广泛	感人	格
人	举	欢乐	海鲜	规划	刚好	格格不入
认识	举手	环	含	鬼	岗位	格局
认真	举行	环保	含量	柜子	港口	格式
日	句	环境	含义	滚	高层	隔阂
日期	句子	会议	含有	锅	高档	隔离
肉	卡	会员	寒假	国籍	高等	个案
三	开机	活	寒冷	国民	高峰	个头儿
山	开心	火	行业	过度	高考	各奔前程
商场	开学	机器	航班	过敏	高科技	各式各样
商店	看法	积极	航空	过于	高手	根基
上	考生	基本	毫米	害	稿子	根深蒂固
上班	靠	基本上	毫升	汗	歌唱	根源
上边	科	基础	好友	好运	歌词	根治
上车	科学	及时	号码	号召	歌星	跟不上
上次	可爱	极了	好	合并	革新	跟上
上课	可能	集体	合同	合成	更是	跟踪
上网	可怕	集中	黑暗	盒	工商	更改
上午	可是	计算	红包	盒饭	公	更衣室
上学	可以	记录	后头	盒子	公安	耕地
少	克	记者	厚	贺卡	公鸡	耿直
谁	刻	纪录	呼吸	恨	公众	工地
身上	客人	纪念	忽视	猴	公主	工会
身体	课堂	技术	户	后悔	攻击	工科
什么	空气	继续	护士	胡同儿	供给	工商界
生病	哭	加工	花	胡子	宫	工序
生气	快餐	加快	划	虎	巩固	工整
生日	快点儿	加强	怀念	华语	贡献	工作量
十	快乐	家具	怀疑	滑	构建	弓
时候	快要	家属	缓解	化石	孤独	公安局
时间	筷子	家乡	黄瓜	划分	孤儿	公车
事	拉	价格	黄金	画面	姑姑	公道
试	来自	价钱	回复	环节	古典	公费
是	蓝	价值	汇	慌	股	公共场所
是不是	蓝色	架	汇报	慌忙	股东	公关
手	篮球	坚持	汇率	灰色	股票	公函
手机	老	坚决	婚礼	恢复	故障	公积金
书	老/老王	坚强	火	回报	顾	公开信
书包	老年	简单	伙	回避	刮	公款
书店	老朋友	简直	伙伴	回顾	拐	公立
树	老是	建	或许	回收	关爱	公墓
水	离	建成	货	回头	关联	公仆
水果	离开	建立	获	回信	观光	公顷
睡	礼物	建设	获得	回忆	官司	公然
睡觉	里头	建议	获奖	汇款	管道	公示
说	理想	将近	获取	会谈	光辉	公事
说话	例如	将来	几乎	活力	广阔	公务
四	例子	交费	机构	活泼	轨道	公益
送	脸	交警	机遇	火柴	跪	公益性
岁	练	交流	积累	火腿	国产	公用
他	练习	交往	激动	火灾	国歌	公寓
他们	凉	交易	激烈	或是	国会	公约
她	凉快	叫	及格	机器人	国旗	公证
她们	两	较	极	机制	国王	公职
太	亮	教材	极其	肌肉	果酱	功
天	辆	教练	即将	基地	果树	功臣
天气	零下	结实	急忙	基金	过渡	功底
听	留	接待	集合	即使	过后	功劳
听到	留下	接近	记载	集团	过时	功力
听见	留学生	节约	纪律	挤	海报	功率
听写	流	结合	技巧	记忆	海底	功效
同学	流利	结婚	系	技能	海军	攻
图书馆	流行	结束	季	继承	海浪	攻读
外	路边	解决	季度	加热	海外	攻关
外边	旅客	解开	季节	加上	海湾	供
外国	旅行	金	既	加速	海洋	供不应求
外语	旅游	金牌	既然	加以	好容易/好不容易	供暖
玩儿	绿	仅	寄	夹	好似	供求
晚	绿色	仅仅	加班	甲	好转	宫殿
晚饭	卖	尽量	加入	价	好学	宫廷
晚上	满	紧	加油站	驾驶	合约	恭维
网上	满意	紧急	家务	驾照	和谐	恭喜
网友	猫	紧张	假如	坚定	核心	拱
忘	米	进步	坚固	肩	黑夜	共鸣
忘记	面	进一步	检测	艰苦	很难说	共识
问	面前	进展	减	艰难	狠	共同体
我	名	近期	减肥	检验	横	共性
我们	名称	京剧	减少	减轻	衡量	供奉
五	名单	经济	简历	剪	宏大	勾
午饭	明星	经历	健身	剪刀	洪水	勾画
西	目的	经验	渐渐	剪子	忽略	勾结
西边	拿出	经营	江	间接	壶	钩
洗	拿到	精彩	讲究	建造	互动	钩子
洗手间	那	精神	讲座	建筑	户外	构思
喜欢	那会儿	景色	奖	健全	护	构想
下	那么	警察	奖金	键	花费	购
下班	那时候/那时	静	奖学金	键盘	花瓶	够呛
下边	那样	久	降	将	花生	估算
下车	南方	旧	降低	将要	化解	沽名钓誉
下次	难过	救	降价	奖励	幻想	孤单
下课	难看	就业	降落	交代	患者	孤立
下午	难受	举办	降温	郊区	皇帝	孤零零
下雨	难题	具体	交换	胶带	回应	孤陋寡闻
先	难听	具有	交际	胶水	毁	辜负
先生	能够	剧场	教授	脚步	会见	古董
现在	年级	据说	教训	接触	会长	古怪
想	年轻	决定	阶段	接连	绘画	古迹
小	鸟	决赛	街道	解除	昏	古今中外
小孩儿	弄	决心	节省	解放	混	古朴
小姐	努力	绝对	结	戒	混合	古人
小朋友	爬	咖啡	结构	届	混乱	股份
小时	爬山	开发	结论	今日	活跃	股民
小学	怕	开放	姐妹	尽管	火箭	股市
小学生	排	开始	解释	紧紧	机动车	骨干
笑	排队	开业	尽快	尽可能	机关	骨气
写	排球	开展	紧密	进化	机械	骨折
谢谢	碰	看起来	尽力	近来	基督教	鼓动
新	碰到	看上去	进口	经费	激情	鼓舞
新年	碰见	考验	近代	景象	吉利	固然
星期	篇	科技	禁止	警告	吉祥	固执
星期日	便宜	可靠	经典	竞赛	极端	故
星期天	片	可乐	精力	竞争	急救	顾不得
行	漂亮	克服	竟然	酒鬼	疾病	顾不上
休息	平	客观	镜头	救灾	集	顾及
学	平安	课程	镜子	居然	给予	顾虑
学生	平常	空	究竟	局面	加盟	顾全大局
学习	平等	空调	酒吧	局长	家电	雇
学校	平时	恐怕	居民	举动	家园	雇佣
学院	瓶	空儿	居住	拒绝	嘉宾	雇员
要	瓶子	裤子	局	俱乐部	假日	雇主
爷爷	普通	快速	巨大	剧本	尖	瓜分
也	普通话	困	具备	决不	检测	瓜子
页	其他	困难	距离	绝望	监督	刮风
一	其中	浪费	聚	军人	捡	寡妇
衣服	骑	老百姓	聚会	开幕	简介	挂钩
医生	骑车	老板	卷	开幕式	剑	挂号
医院	起飞	老太太	角色	看成	鉴定	挂念
一半	气	老头儿	开花	看出	箭	挂失
一会儿	气温	乐	开水	看待	将军	乖
一块儿	千	乐观	看不起	考核	讲课	乖巧
一下儿	千克	类	看来	烤肉	酱	拐弯
一样	前年	类似	看望	烤鸭	酱油	拐杖
一边	墙	离婚	考察	靠近	骄傲	怪不得
一点儿	青年	里面	考虑	颗	焦点	怪物
一起	青少年	理发	棵	咳	脚印	怪异
一些	轻	理解	可见	可	觉	关掉
用	清楚	理论	空间	可怜	教堂	关节
有	晴	理由	空	可惜	教育部	关税
有的	晴天	力	口袋	渴望	接收	关头
有名	请客	力量	口语	刻	揭	关照
有时候/有时	请求	立刻	苦	客户	接头	观测
有些/有一些	秋天	利用	会计	客气	节	观感
有用	求	连	快递	客厅	节假日	观摩
右	球场	连忙	宽	课题	节能	观赏
右边	球队	连续	宽广	肯定	节奏	观望
雨	球鞋	连续剧	矿泉水	空中	杰出	官兵
元	取	联合	扩大	控制	截止	官吏
远	取得	联合国	扩展	口号	截至	官僚
月	全	联系	括号	库	解	官僚主义
再	全部	凉水	垃圾	快活	解说	官员
再见	全国	了	拉开	宽度	界	棺材
在	全家	领	辣	狂	界/文艺界	管家
在家	全年	领导	来不及	亏	借鉴	管教
早	全身	领先	来得及	困扰	金额	管理费
早饭	全体	另外	来源	落	金钱	管辖
早上	然后	另一方面	老公	来信	金融	管用
怎么	让	留学	老家	烂	尽	管子
站	热情	龙	老婆	朗读	进攻	贯彻
找	人口	录	老实	浪漫	近日	贯穿
找到	人们	录音	乐趣	劳动	近视	贯通
这	人数	路线	泪	梨	惊人	惯
这边	认为	旅馆	泪水	礼	惊喜	惯例
这里	日报	旅行社	类型	礼拜	精	惯性
这儿	日子	绿茶	冷静	礼貌	精美	灌
这些	如果	乱	厘米	厉害	精品	灌溉
着	入口	落后	离不开	立	井	灌输
真	商量	麻烦	力气	立场	景	罐头
真的	商人	马	历史	利润	景点	光彩
正	上周	满足	立即	例外	净	光碟
正在	少数	慢慢	利息	连接	纠纷	光顾
知道	少年	毛	利益	联络	纠正	光滑
知识	身边	毛病	俩	联想	酒水	光环
中	什么样	没用	良好	脸盆	救命	光缆
中国	生	媒体	量	脸色	救援	光芒
中间	生词	每	粮食	恋爱	救助	光明磊落
中文	生活	美	两边	两岸	就是说	光泽
中午	声音	美好	疗养	邻居	就算	广义
中学	省	美丽	了不起	铃	局	归根到底
中学生	十分	美食	了解	铃声	剧	归还
重	实际	美术	列	领带	据	归结
重要	实习	美元	列车	令	捐	归来
住	实现	迷	列入	流动	捐款	归纳
准备	实在	米	列为	流通	捐赠	归属
桌子	食物	面对	临时	漏	捐助	归宿
字	使用	面积	零食	漏洞	决策	龟
子/桌子	市	民间	流传	逻辑	觉悟	规格
走	市长	民族	楼梯	落实	绝	规矩
走路	事情	明确	陆地	码头	绝大多数	闺女
最	收	明显	陆续	骂	军队	瑰宝
最好	收到	命运	录取	买卖	军舰	轨迹
最后	收入	某	律师	漫长	军事	柜台
昨天	手表	母亲	轮	漫画	开创	贵宾
左	受到	木头	轮船	毛笔	开关	贵重
左边	舒服	目标	轮椅	矛盾	开设	贵族
坐	熟	目前	轮子	冒	开通	桂花
坐下	数	奶茶	论文	贸易	开头	滚动
做	数字	男子	落	煤	开夜车	棍
	水平	南部	毛巾	煤气	看	棍子
	顺利	难道	毛衣	门诊	看管	国宝
	说明	难度	帽子	迷人	看得见	国防
	司机	内	没错	迷信	看得起	国画
	送到	内容	没法儿	面貌	看好	国徽
	送给	内心	没想到	面子	看作	国情
	算	能不能	美金	秒	康复	国土
	虽然	能力	美女	敏感	抗议	国学
	随便	年初	梦	明亮	考场	国有
	随时	年代	梦见	明明	考题	果断
	所以	年底	梦想	命令	科研	果园
	所有	年纪	秘密	模范	客车	果真
	它	念	秘书	模仿	肯	裹
	它们	牛	密	模糊	空军	过半
	太太	农村	密码	模式	口试	过不去
	太阳	农民	密切	摩擦	扣	过错
	态度	农业	免费	摩托	酷	过道
	讨论	女子	面临	模样	跨	过关
	套	暖和	面试	目光	快车	过奖
	特别	怕	描述	耐心	宽阔	过节
	特点	拍	描写	男性	矿	过境
	疼	排	名牌儿	南北	阔	过滤
	提	排名	名片	南极	啦	过期
	提出	牌子	名人	难得	来往	过日子
	提到	派	摸	难以	赖	过剩
	提高	判断	模特儿	脑子	栏目	过失
	题	胖	模型	内在	蓝领	过头
	体育	跑步	末	能量	蓝天	过往
	体育场	配	默默	年度	懒	过意不去
	体育馆	配合	哪怕	年龄	牢	过瘾
	天上	批评	哪	年前	老乡	过硬
	条	批准	男女	牛	冷气	过早
	条件	皮	男士	牛仔裤	冷水	海岸
	听讲	皮包	难免	农产品	礼堂	海拔
	听说	啤酒	脑袋	女性	理	海滨
	停	票价	闹	暖	理财	海盗
	停车	评价	闹钟	偶尔	理智	海量
	停车场	苹果	内部	偶然	力/影响力	海绵
	挺	破	内科	偶像	利	海面
	挺好	破坏	能干	拍摄	联盟	海内外
	通	普遍	宁静	排除	联赛	海滩
	通过	普及	浓	旁	联手	海峡
	通知	期	女士	陪	凉鞋	海啸
	同时	齐	暖气	赔	两侧	海域
	同事	其次	拍照	赔偿	两手	海运
	同样	其实	排列	配备	聊	海藻
	头	奇怪	牌	配套	聊天儿	骇人听闻
	头/里头	气候	盘	喷	料	害虫
	头发	千万	盘子	盆	裂	害臊
	图片	前后	胖子	披	灵活	害羞
	推	前进	培训	皮肤	领取	酣畅
	腿	前面	培训班	皮鞋	领袖	酣睡
	外地	前往	培养	脾气	另	含糊
	外卖	强	培育	匹	留言	含蓄
	完	强大	批	骗	流感	函授
	完成	强调	片面	骗子	楼道	涵盖
	完全	强烈	品质	拼	楼房	涵义
	晚安	桥	平方	频道	露	罕见
	晚报	巧	平静	频繁	陆军	汗水
	晚餐	亲	平均	品	录像	旱
	晚会	亲切	平稳	品/工艺品	录音机	旱灾
	碗	亲人	迫切	品种	路过	捍卫
	万	亲自	破产	平坦	旅店	焊
	网	情感	妻子	平原	绿化	行家
	网球	情况	期待	评估	马车	行列
	网站	请教	期间	评论	嘛	行情
	往	庆祝	期末	凭	埋	航海
	为	球迷	期限	泼	馒头	航天
	为什么	区	期中	葡萄	慢车	航天员
	位	区别	其余	葡萄酒	盲人	航行
	味道	取消	企业	期望	梅花	航运
	喂	去世	气球	齐全	美容	毫不
	温度	全场	汽水	其	蒙	豪不犹豫
	闻	全面	汽油	启动	猛	毫无
	问路	全球	器官	启发	棉	豪华
	问题	缺	前头	启事	免得	好比
	午餐	缺点	前途	起到	面对面	好歹
	午睡	缺少	浅	起码	面向	好感
	西北	确保	巧克力	气体	妙	好坏
	西餐	确定	切	气象	灭	好家伙
	西方	确实	亲爱	签	民歌	好评
	西南	裙子	亲密	签订	民工	好说
	西医	群	青春	签名	民警	好笑
	习惯	热爱	轻松	签约	民意	好心
	洗衣机	热烈	轻易	签证	民主	好心人
	洗澡	人才	清醒	签字	名额	好意
	下	人工	情景	前景	名胜	好在
	下雪	人口	穷	前提	名义	号称
	下周	人类	穷人	欠	名誉	好客
	夏天	人民	秋季	枪	明日	好奇心
	相同	人民币	趋势	强度	命	耗
	相信	人群	圈	墙壁	膜	耗费
	响	人生	权利	抢	磨	耗时
	想到	人员	却	抢救	没收	浩劫
	想法	认出	确认	强迫	墨水	呵护
	想起	认得	然而	悄悄	母	禾苗
	向	认可	燃料	敲	母鸡	合唱
	相机	任	燃烧	敲门	母女	合乎
	像	任何	热闹	瞧	母子	合伙
	小/小王	任务	热心	琴	墓	合计
	小声	仍	人家	勤奋	拿走	合情合理
	小时候	仍然	日记	青	奶粉	合影
	小说	日常	日历	清晨	奶牛	合资
	小心	容易	如今	清理	难忘	合作社
	小组	如何	弱	情节	内地	何必
	校园	散步	伞	情形	内外	何处
	校长	沙发	散	晴朗	内衣	何苦
	笑话	沙子	扫	区域	能否	何况
	笑话儿	伤	色	全都	泥	何时
	鞋	伤心	色彩	全世界	扭	和蔼
	心里	商品	森林	泉	排行榜	和解
	心情	商业	晒	劝	派出	和睦
	心中	上来	闪	缺乏	判	和平共处
	新闻	上面	闪电	确立	盼望	和气
	信	上去	善良	群体	泡	和尚
	信号	上升	善于	群众	炮	河流
	信息	上衣	伤害	染	陪同	河畔
	信心	设备	商务	绕	配置	荷花
	信用卡	设计	赏	热量	皮球	核
	星星	设立	上个月	热门	偏	核电站
	行动	社会	上楼	人间	贫困	核对
	行人	身份证	上门	人力	品牌	核能
	行为	深	烧	人士	聘请	核实
	姓	深刻	设施	人物	平凡	核桃
	姓名	深入	设置	忍	平方米	核武器
	休假	升	申请	忍不住	平衡	贺电
	许多	生	身材	忍受	平台	贺信
	选	生产	身份	认	评	喝彩
	学期	生存	身高	认定	评选	赫然
	雪	生动	深厚	扔	屏幕	鹤立鸡群
	颜色	生命	神话	仍旧	坡	黑白
	眼	生意	神秘	如此	扑	黑客
	眼睛	生长	甚至	如同	铺	黑马
	养	声明	失败	如下	欺负	黑手
	样子	胜	失望	入门	奇妙	黑心
	要求	胜利	失业	软	企图	嘿
	药	失去	诗	软件	起点	痕迹
	药店	石头	诗人	洒	起诉	恨不得
	药片	石油	湿	散	气氛	哼
	药水	时	实施	散文	恰当	横七竖八
	也许	时代	实用	杀	恰好	横向
	夜	时刻	食堂	杀毒	恰恰	横
	夜里	实际上	使劲	沙漠	牵	轰
	一部分	实力	士兵	傻	铅笔	轰动
	一定	实行	市区	山区	谦虚	轰炸
	一共	实验	似的	扇	前方	哄
	一会儿	实验室	事物	扇子	前来	哄堂大笑
	一路平安	食品	事先	商标	潜力	烘干
	一路顺风	使	试卷	上级	强盗	烘托
	已经	始终	是否	上下	强化	弘扬
	以后	世纪	收回	上涨	强势	红灯
	以前	世界	收获	稍	强壮	红火
	以上	世界杯	收益	稍微	桥梁	红扑扑
	以外	市场	手工	蛇	巧妙	红润
	以为	事故	手里	舍不得	茄子	红薯
	以下	事件	手术	舍得	切实	红眼
	椅子	事实	手套	设想	侵犯	宏观
	一般	事实上	守	社	亲属	宏伟
	一点点	事业	首	社区	亲眼	洪亮
	一生	试题	受不了	射	倾向	喉咙
	一直	试验	售货员	射击	清	吼
	亿	适合	叔叔	摄像	清洁	后备
	意见	适应	舒适	摄像机	清洁工	后备箱
	意思	适用	熟练	摄影	清明节	后代
	因为	室	暑假	摄影师	清洗	后盾
	阴	收费	树林	伸	情绪	后顾之忧
	阴天	收看	树叶	深处	求职	后期
	音节	收听	数据	深度	球拍	后勤
	音乐	收音机	数码	神	球星	后人
	音乐会	手续	刷	神经	球员	后台
	银行	手指	刷牙	神奇	区分	后退
	银行卡	首都	刷子	神情	渠道	后续
	应该	首先	帅	升高	取款	后遗症
	英文	受	帅哥	生成	取款机	后裔
	英语	受伤	率先	声	去掉	后者
	影片	书架	睡着	胜负	权	厚道
	影响	输	顺序	剩	权力	厚度
	永远	输入	说不定	剩下	全力	候选人
	油	熟人	说服	失误	全新	呼风唤雨
	游客	属	思考	师傅	券	呼唤
	友好	属于	似乎	诗歌	缺陷	呼救
	有空儿	束	松	十足	却是	呼声
	有人	数量	松树	时常	让座	呼应
	有点儿/有一点儿	双	塑料	时光	热点	呼吁
	有意思	双方	塑料袋	时机	热水	忽高忽低
	又	思想	酸	时事	热水器	忽悠
	鱼	死	酸奶	实惠	热线	胡闹
	语言	速度	随手	拾	人权	胡说
	原来	随	孙女	使得	认同	胡思乱想
	原因	所	孙子	示范	日夜	湖泊
	院	所长	缩短	式	日语	糊
	院长	台	缩小	势力	融合	糊涂
	院子	谈	台阶	试图	融入	互补
	愿意	谈话	台上	视频	如	互访
	月份	谈判	躺	视为	如一	互信
	月亮	汤	套餐	收购	乳制品	互助
	越	糖	特价	收集	入	护理
	越来越	特色	特殊	收拾	入学	花瓣
	云	提前	特征	手段	若	花卉
	运动	提问	提供	手法	塞	花纹
	咱	题目	提醒	寿司	赛	花样
	咱们	体会	体操	受灾	赛场	划算
	脏	体现	体检	瘦	三明治	华丽
	早餐	体验	体重	书法	丧失	华侨
	早晨	天空	替	书柜	山峰	华裔
	早就	甜	替代	书桌	山谷	哗变
	怎么办	调整	天真	输出	山坡	哗然
	怎么样	跳	填	蔬菜	伤口	滑冰
	怎样	跳高	填空	熟悉	伤亡	滑稽
	占	跳舞	挑	鼠	伤员	滑梯
	站	跳远	挑选	鼠标	商城	滑雪
	站住	铁	调皮	数目	上当	化肥
	长大	铁路	挑战	摔	上帝	化身
	找出	听力	贴	摔倒	上市	化纤
	照顾	听众	停下	率领	上台	化险为夷
	照片	停止	挺	双手	上演	化验
	照相	通常	通知书	水产品	勺	化妆
	这么	通信	同情	水分	少儿	划时代
	这时候/这时	同意	童话	水库	舌头	画册
	这样	痛	童年	水灾	设计师	画龙点睛
	真正	痛苦	统计	睡眠	涉及	画蛇添足
	正常	头	统一	说法	深化	画展
	正好	头脑	痛快	硕士	深深	话费
	正确	突出	投	私人	审查	话筒
	正是	突然	投入	思维	升级	话语
	直接	图	投诉	四周	升学	怀抱
	只	图画	投资	搜	升值	怀旧
	只能	土	透	搜索	生活费	怀里
	只要	团	透明	宿舍	省钱	怀孕
	纸	团结	图案	酸甜苦辣	圣诞节	怀着
	中餐	团体	途中	随后	盛行	槐树
	中级	推动	土地	随意	师父	坏事
	中年	推广	推迟	随着	师生	欢呼
	中小学	推进	推销	岁月	时而	欢聚
	中心	推开	脱	碎	时节	欢快
	中医	退	袜子	损害	时期	欢声笑语
	重点	退出	外汇	损失	时时	还款
	重视	退休	外交官	所在	时装	还原
	周	外交	外套	锁	识	环球
	周末	外面	弯	台风	识字	环绕
	周年	外文	晚点	抬	实践	缓
	主人	完美	万一	抬头	食欲	缓和
	主要	完善	王	太空	市民	缓缓
	住房	完整	网络	弹	事后	缓慢
	住院	玩具	网址	逃	试点	幻觉
	装	往往	微笑	逃跑	适当	幻影
	准确	危害	微信	逃走	收藏	换成
	自己	危险	围巾	桃	收取	换取
	自行车	为	维持	桃花	收养	换位
	自由	围	维护	桃树	手续费	换言之
	字典	伟大	维修	讨厌	首	唤起
	走过	卫生	尾巴	特定	首次	患
	走进	卫生间	未必	特性	首脑	患病
	走开	为了	未来	特有	首席	患有
	租	温暖	位于	提倡	首相	焕发
	组	文化	位置	提起	书房	荒
	组成	文件	味儿	提示	薯片	荒诞
	组长	文明	喂	题材	薯条	荒凉
	嘴	文学	稳	体积	双打	荒谬
	最近	文章	稳定	体力	爽	慌乱
	作家	文字	问候	天才	水泥	慌张
	作文	握手	无	天然气	税	皇宫
	作业	屋子	无法	天文	顺	皇后
	作用	武器	无聊	调节	说明书	皇上
	座	武术	无论	调解	说实话	皇室
	座位	舞台	无数	厅	司长	黄昏
	做到	西部	无所谓	停留	死亡	恍然大悟
	做法	希望	无限	通用	四处	晃
	做饭	系	五颜六色	偷	寺	谎话
		下来	误会	偷偷	送礼	谎言
		下面	西瓜	突破	送行	晃荡
		下去	吸	土豆	素质	灰
		先进	吸管	吐	算了	灰尘
		显得	吸收	兔	算是	灰心
		显然	吸烟	团长	虽	挥
		显示	吸引	推行	岁数	辉煌
		现场	喜爱	脱离	所	回归
		现代	系列	外界	踏实	回扣
		现金	系统	完了	塔	回馈
		现实	细	微博	踏	回落
		现象	细节	为难	台灯	回升
		线	细致	为期	太阳能	回首
		相比	下个月	为止	叹气	回味
		相当	下降	为主	探索	回想
		相关	下楼	违法	探讨	回忆录
		相互	下载	违反	趟	悔恨
		相似	夏季	违规	掏	毁坏
		香	鲜	围绕	特	毁灭
		香蕉	鲜花	唯一	特大	汇合
		消费	鲜明	委托	特地	汇集
		消失	咸	卫星	特快	汇聚
		消息	显著	胃	特意	会场
		效果	县	慰问	疼痛	会面
		写作	限制	温和	踢	会晤
		血	相处	文艺	提交	会意
		心	相反	卧室	提升	会诊
		信	箱	握	天然	绘声绘色
		信封	箱子	污染	天堂	贿赂
		信任	想念	污水	天下	昏迷
		行李	想象	屋	添	婚纱
		形成	项	无奈	田	婚姻
		形式	项目	无疑	田径	浑身
		形象	相片	舞	跳水	魂
		形状	消化	物价	听取	混凝土
		幸福	销售	物业	通报	混淆
		幸运	小吃	物质	通道	混浊
		性/积极性	小伙子	误解	通红	豁
		性别	小型	西红柿	通话	豁出去
		性格	效率	西装	通行	活该
		修	些	喜剧	通讯	活期
		修改	心理	戏	同	活儿
		需求	新郎	戏剧	同胞	火暴
		需要	新娘	吓	同行	火锅
		宣布	新鲜	先后	同期	火候
		宣传	新型	先前	同一	火花
		选手	兴奋	鲜艳	铜牌	火炬
		学费	形容	闲	头疼	火辣辣
		训练	形势	显	投票	火热
		压	型	现有	透露	火山
		压力	型号	现状	图书	火速
		烟	醒	线索	徒弟	火焰
		眼前	兴趣	献	途径	火药
		演	性质	乡	土	伙食
		演唱	兄弟	乡村	团队	或多或少
		演唱会	胸部	相等	推出	货币
		演出	修理	相应	退票	货车
		演员	选择	香肠	吞	货物
		羊	学分	详细	托	货运
		阳光	学年	享受	拖	获胜
		要是	学时	向导	拖鞋	获悉
		衣架	学术	向前	挖	祸害
		一切	学问	向上	娃娃	霍乱
		已	寻找	相声	哇	豁达
		以来	迅速	象征	外币
		一方面	牙	消除	外部
		艺术	牙刷	消毒	外出
		意外	亚运会	消防	外观
		意义	呀	消费者	外科
		因此	延长	消极	外来
		银	延期	小偷儿	外头
		银牌	延续	歇	外衣
		印象	严	协议	外资
		应当	严格	协议书	弯曲
		迎接	严重	斜	顽皮
		营养	研究	心态	顽强
		赢	研究生	心疼	王后
		影视	研制	辛苦	王子
		应用	盐	欣赏	网吧
		优点	眼镜	信念	网页
		优势	眼泪	信箱	往后
		由	眼里	行驶	往来
		由于	演讲	形态	往年
		邮件	阳台	性能	望见
		邮票	养成	雄伟	危机
		邮箱	腰	熊	威胁
		游	摇	休闲	微波炉
		游戏	药物	修复	维生素
		游泳	要	修建	为此
		有的是	业余	修养	为何
		有利	叶子	虚心	文娱
		有效	医疗	许可	卧铺
		预报	医学	选修	乌云
		预防	依靠	学科	无边
		预计	依然	学位	无关
		预习	一律	学者	无效
		员/服务员	一再	寻求	舞蹈
		员工	一致	询问	物品
		愿望	移	押金	误
		约	移动	鸭子	西班牙语
		乐队	移民	亚军	吸毒
		运输	遗产	延伸	牺牲
		杂志	遗传	严厉	洗衣粉
		早已	疑问	严肃	戏曲
		造	以及	言语	细胞
		造成	以内	研究所	细菌
		责任	一般来说	眼光	先锋
		增加	义务	邀请	嫌
		增长	议论	摇头	显出
		展开	引	咬	险
		张	引导	也好	线路
		照	引进	业务	陷入
		者/志愿者	引起	夜间	响声
		真实	应	一流	想不到
		争	英勇	依法	消耗
		争取	营业	依旧	消灭
		整	赢得	依据	小费
		整个	影子	依照	小麦
		整理	勇敢	一辈子	小于
		整齐	勇气	一带	晓得
		整体	用途	一旦	笑脸
		整天	优良	一句话	笑容
		整整	优美	一路	笑声
		正	优秀	一下儿	协会
		正式	邮局	一下子	协商
		证	有劲儿	一向	协调
		证件	有趣	乙	协助
		证据	有限	以便	写字楼
		证明	幼儿园	以往	写字台
		支	于是	一口气	心灵
		支持	语法	一身	心愿
		支付	语音	意识	心脏
		只	玉	意味着	心脏病
		直	玉米	意志	新人
		直播	预测	因而	新兴
		直到	预订	饮料	薪水
		值	遇	饮食	信仰
		值得	遇到	印刷	信用
		职工	遇见	应	兴旺
		职业	原料	硬	行程
		只好	原则	硬件	形
		只是	圆	拥抱	凶
		只有	圆满	拥有	凶手
		指	约会	用不着	修车
		指出	月底	用户	袖珍
		指导	阅读	用来	悬
		至今	运动会	用于	旋转
		至少	运动员	优惠	选拔
		志愿	运气	优先	选举
		志愿者	运用	幽默	学会
		制定	再三	尤其	学员
		制度	在乎	由此	血管
		制造	在于	犹豫	血液
		制作	赞成	游泳池	循环
		中部	赞赏	友谊	压迫
		中华民族	赞助	有毒	烟花
		终于	造型	有害	沿
		钟	战斗	有力	沿海
		种	战胜	有利于	沿着
		种子	战士	有着	研发
		重大	战争	羽毛球	眼看
		周围	丈夫	羽绒服	演奏
		猪	招呼	雨水	宴会
		主持	着	预备	洋
		主动	着火	预期	仰
		主任	着急	元旦	养老
		主意	召开	园林	氧气
		主张	折	原理	样
		注意	针	原始	药品
		祝	针对	原先	要不然
		抓	阵	原有	要好
		抓住	争论	远处	要么
		专家	征服	怨	要素
		专门	征求	愿	野
		专题	政府	约束	野生
		专业	政治	月饼	医药
		转	之后	月球	依次
		转变	之间	阅览室	依赖
		状况	之前	运	一次性
		状态	之一	运行	一代
		追	支	灾	一道
		准	植物	灾害	一贯
		资格	指挥	灾难	一路上
		资金	制订	灾区	仪器
		子女	质量	再次	仪式
		自从	治	再也	遗憾
		自动	治疗	在场	一番
		自觉	智力	在内	一模一样
		自然	智能	暂时	一齐
		自身	中介	暂停	一时
		自主	种类	糟	一同
		总	中奖	糟糕	一行
		总结	种	早期	艺人
		总是	种植	增	议题
		足够	重量	增产	异常
		足球	逐步	增大	意想不到
		组合	逐渐	增多	意愿
		左右	主题	增强	因
		作品	主席	赠	因素
		作者	祝福	赠送	阴谋
		做客	著名	摘	阴影
			著作	展览	音量
			抓紧	展示	音像
			专心	展现	隐藏
			转动	占领	隐私
			转告	占有	印
			转身	涨	英雄
			转弯	涨价	迎来
			转移	掌握	影迷
			装修	招生	影星
			装置	招手	应对
			追求	珍贵	应急
			准时	珍惜	用处
			资料	珍珠	用得着
			资源	真诚	用法
			自	真理	用品
			自信	真相	用心
			字母	诊断	优质
			综合	振动	游人
			总共	震惊	游玩
			总理	争议	游戏机
			总统	正版	游行
			总之	正规	有关
			阻止	正如	有没有
			嘴巴	正义	有事
			最初	证实	于
			作出	证书	娱乐
			作为	挣	愉快
			做梦	挣钱	与
				之内	宇航员
				之外	雨衣
				之下	预约
				之中	元素
				支出	园
				支配	原地
				执行	原
				直线	原告
				值班	原谅
				职能	圆珠笔
				职位	援助
				职务	缘故
				只不过	远方
				只见	远离
				指标	远远
				指甲	约定
				指示	乐曲
				指责	晕
				至	允许
				制成	运作
				制约	晕车
				治安	杂
				治理	再生
				中断	再说
				中秋节	遭到
				中央	遭受
				中药	遭遇
				终点	早晚
				终身	增进
				终止	增值
				中毒	扎
				众多	扎实
				周期	炸
				竹子	炸弹
				主办	炸药
				主导	债
				主观	占据
				主管	战场
				主体	战略
				助理	战术
				助手	战友
				注册	站台
				注射	章
				注视	长/秘书长
				注重	掌声
				祝贺	账
				专辑	账户
				专利	涨
				转化	障碍
				转换	招
				转让	招聘
				转向	照样
				装饰	照耀
				撞	哲学
				资本	这就是说
				资产	镇
				资助	争夺
				子弹	整顿
				仔细	整治
				紫	正当
				自豪	政策
				自杀	政党
				自愿	政权
				总裁	症状
				总数	之类
				总算	支撑
				总体	支援
				阻碍	枝
				组织	知名
				醉	织
				尊敬	直升机
				尊重	职责
				遵守	止
					只得
					只顾
					只管
					指定
					指数
					指头
					指着
					至于
					治病
					智慧
					中等
					中华
					中期
					中外
					衷心
					钟头
					肿
					种种
					粥
					珠宝
					诸位
					主持人
					主角
					主流
					煮
					住宅
					驻
					柱子
					祝愿
					专用
					转
					转动
					赚
					赚钱
					装备
					壮观
					追究
					捉
					咨询
					自来水
					自我
					自学
					自言自语
					自在
					宗教
					总部
					总监
					总经理
					总量
					走私
					奏
					租金
					足
					足以
					族
					族/上班族
					祖父
					祖国
					祖母
					钻
					最佳
					最终
					罪
					罪恶
					作
					作废
					作战
					座谈会
